# Supplementary material
Source: MDPI journal article supplement (https://www.mdpi.com/2674-1164/1/1/3)
Supplement: s1 [file s1]

Nutrigenomic in animal feeding: digital gene expression analysis  
in poultry fed *Tenebrio molitor* larvae meal

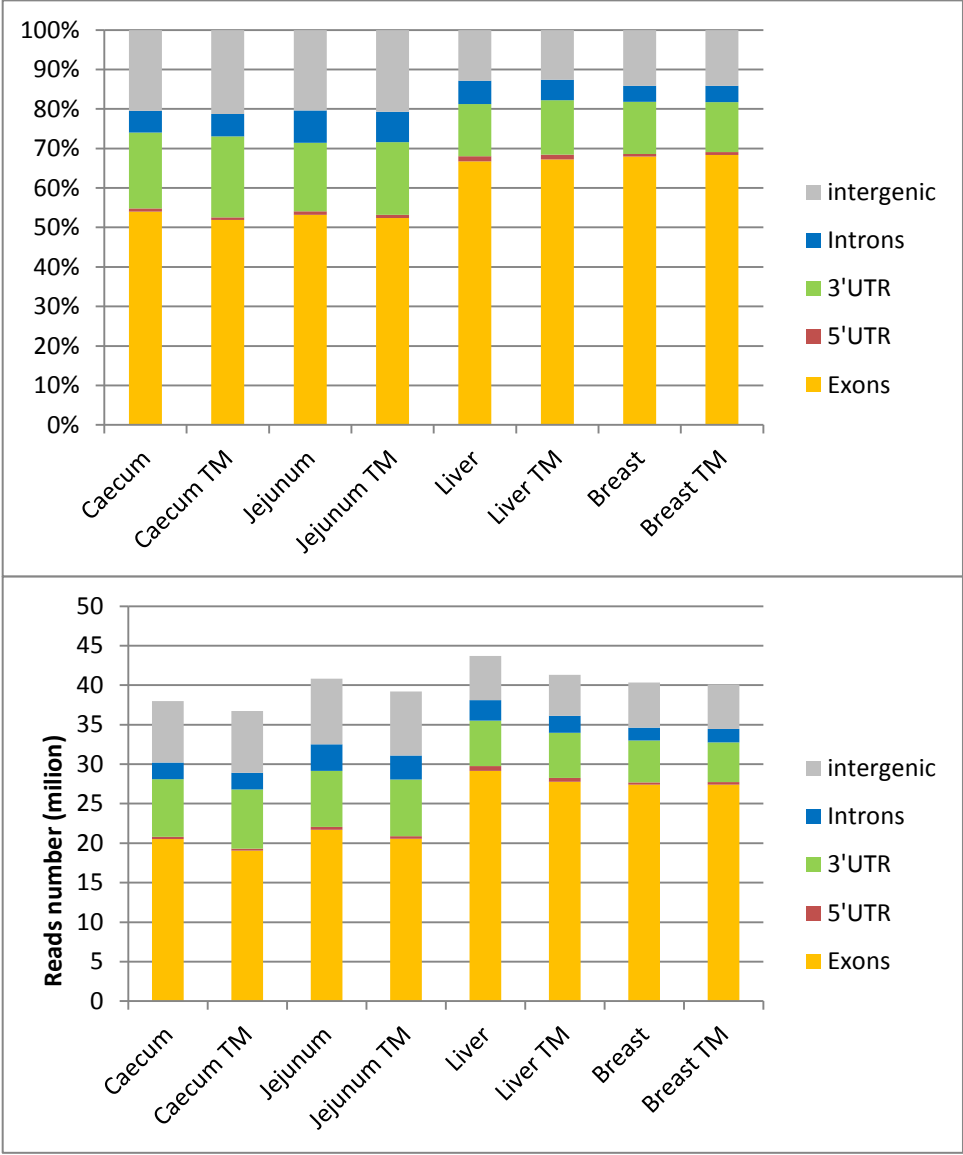

Figure S1. Distribution of categories reads

a) *Caecum*

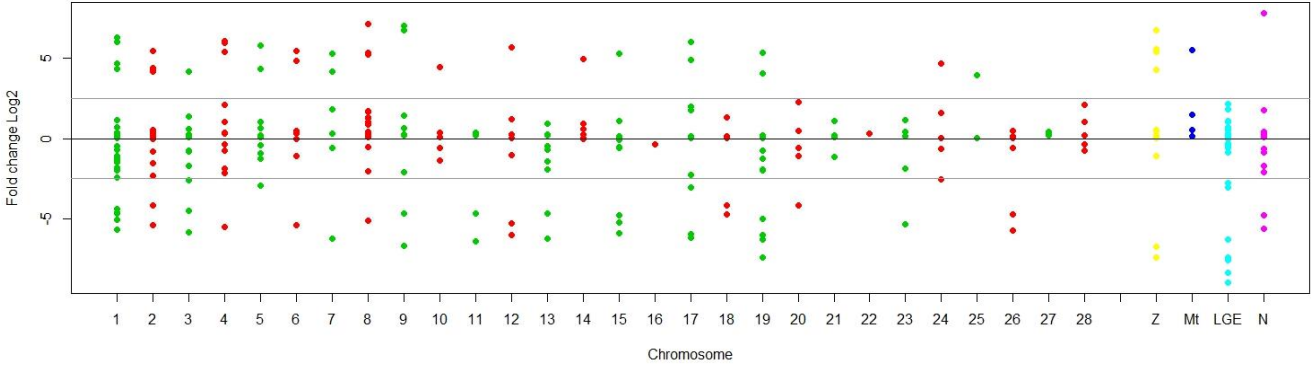

b) *Jejunum*

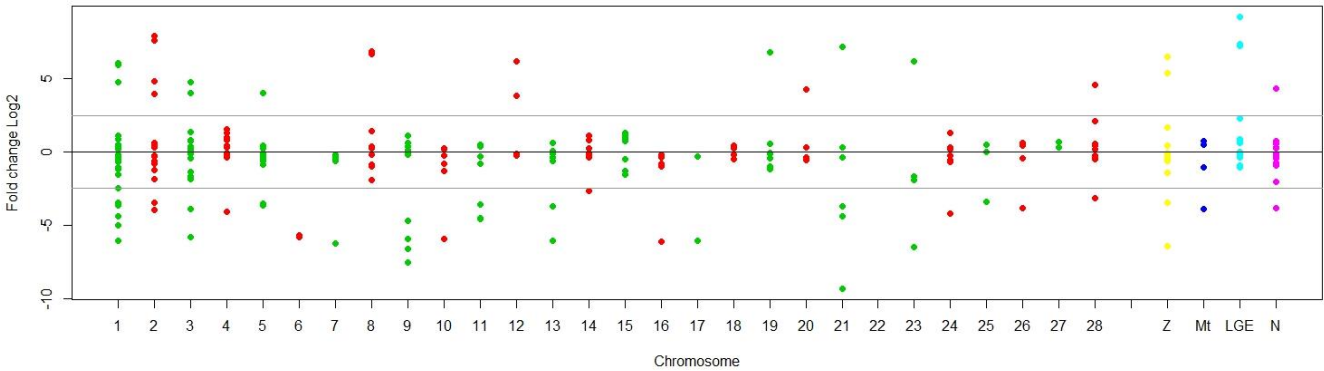

c) *Liver*

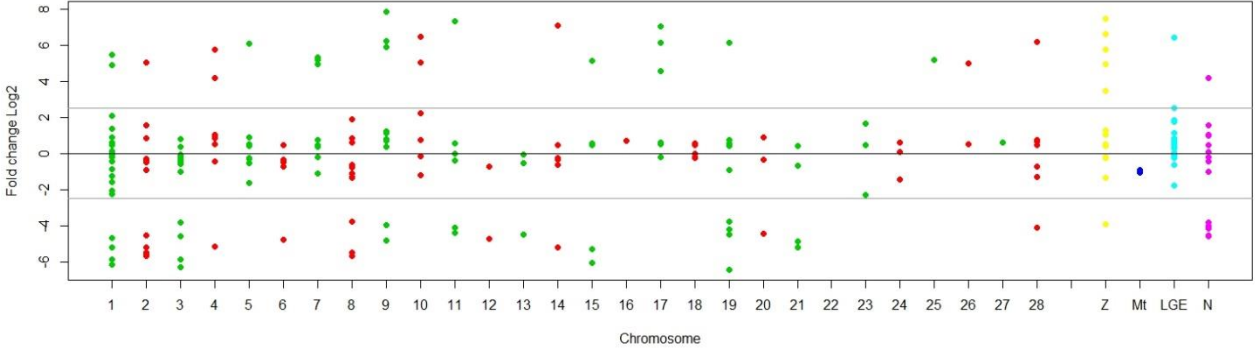

d) Breast

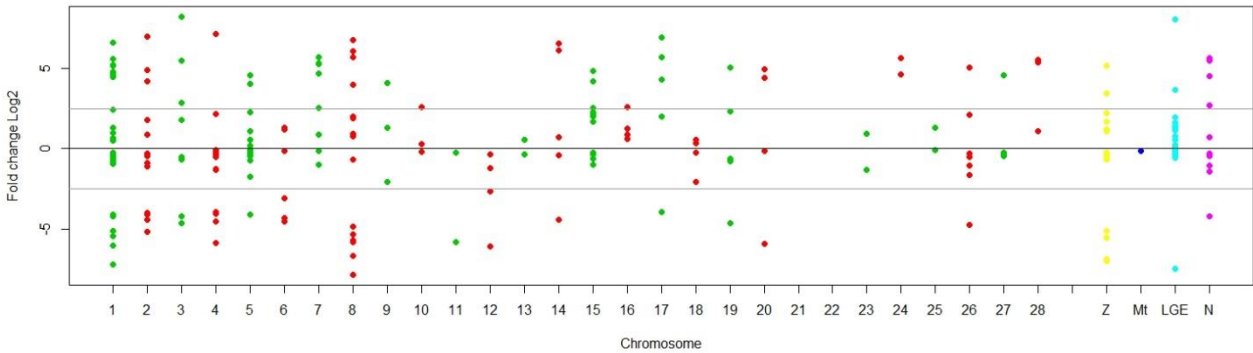

**Figure S2.** Distribution of DEGS on Chromosomes

Table S1. DEGs Pathways analysis

|                       | Pathway name                                                                 | DEGs | GP  | pValue   | FDR      | RF | RT | Gene  |
|-----------------------|------------------------------------------------------------------------------|------|-----|----------|----------|----|----|-------|
| <b><u>Breast</u></b>  |                                                                              |      |     |          |          |    |    |       |
| R-GGA-390522          | Striated Muscle Contraction                                                  | 11   | 56  | 0,011445 | 0,862641 | 4  | 4  | MYL1  |
| R-MMU-390522          | Striated Muscle Contraction                                                  | 25   | 70  | 2,58E-12 | 1,52E-09 | 4  | 4  | TNNC1 |
| <b><u>Liver</u></b>   |                                                                              |      |     |          |          |    |    |       |
| R-HSA-156902          | Peptide chain elongation                                                     | 17   | 99  | 3,23E-06 | 0,001197 | 4  | 5  | RPL12 |
| R-HSA-72689           | Formation of a pool of free 40S subunits                                     | 16   | 106 | 3,61E-05 | 0,005485 | 2  | 2  | RPL12 |
| R-HSA-72764           | Eukaryotic Translation Termination                                           | 16   | 108 | 4,46E-05 | 0,005485 | 3  | 5  | RPL12 |
| R-HSA-975956          | Nonsense Mediated Decay (NMD) independent of the Exon Junction Complex (EJC) | 16   | 102 | 6,71E-05 | 0,00663  | 1  | 1  | RPL12 |
| R-HSA-2408557         | Selenocysteine synthesis                                                     | 16   | 116 | 8,16E-05 | 0,00663  | 2  | 6  | RPL12 |
| R-HSA-1799339         | SRP-dependent cotranslational protein targeting to membrane                  | 16   | 120 | 1,09E-04 | 0,00663  | 5  | 5  | RPL12 |
| R-HSA-156827          | L13a-mediated translational silencing of Ceruloplasmin expression            | 16   | 118 | 1,09E-04 | 0,00663  | 2  | 3  | RPL12 |
| R-HSA-156842          | Eukaryotic Translation Elongation                                            | 17   | 104 | 1,32E-04 | 0,00698  | 7  | 9  | RPL12 |
| R-HSA-192823          | Viral mRNA Translation                                                       | 16   | 114 | 1,43E-04 | 0,007021 | 2  | 2  | RPL12 |
| <b><u>Jejunum</u></b> |                                                                              |      |     |          |          |    |    |       |
| R-HSA-156902          | Peptide chain elongation                                                     | 24   | 99  | 4,38E-08 | 2,08E-05 | 5  | 5  | RPL30 |
| R-HSA-72689           | Formation of a pool of free 40S subunits                                     | 22   | 106 | 2,60E-06 | 5,47E-04 | 2  | 2  | RPL30 |
| R-HSA-72764           | Eukaryotic Translation Termination                                           | 22   | 108 | 3,46E-06 | 5,47E-04 | 3  | 5  | RPL30 |
| R-HSA-975956          | Nonsense Mediated Decay (NMD) independent of the Exon Junction Complex (EJC) | 22   | 102 | 5,98E-06 | 7,40E-04 | 1  | 1  | RPL30 |
| R-HSA-156842          | Eukaryotic Translation Elongation                                            | 24   | 104 | 7,70E-06 | 7,40E-04 | 8  | 9  | RPL30 |
| R-HSA-2408557         | Selenocysteine synthesis                                                     | 22   | 116 | 7,79E-06 | 7,40E-04 | 2  | 6  | RPL30 |
| R-HSA-1799339         | SRP-dependent cotranslational protein targeting to membrane                  | 22   | 120 | 1,14E-05 | 7,77E-04 | 5  | 5  | RPL30 |
| R-HSA-156827          | L13a-mediated translational silencing of Ceruloplasmin expression            | 22   | 118 | 1,14E-05 | 7,77E-04 | 2  | 3  | RPL30 |
| R-HSA-192823          | Viral mRNA Translation                                                       | 22   | 114 | 1,65E-05 | 0,001043 | 2  | 2  | RPL30 |
| <b><u>Caecum</u></b>  |                                                                              |      |     |          |          |    |    |       |
| R-GGA-1799339         | SRP-dependent cotranslational protein targeting to membrane                  | 33   | 94  | 2,95E-08 | 8,34E-06 | 2  | 2  | RPL5  |
| R-GGA-975956          | Nonsense Mediated Decay (NMD) independent of the Exon Junction Complex (EJC) | 33   | 95  | 3,76E-08 | 8,34E-06 | 1  | 1  | RPL5  |
| R-GGA-72689           | Formation of a pool of free 40S subunits                                     | 33   | 106 | 4,31E-07 | 5,73E-05 | 2  | 2  | RPL5  |
| R-GGA-72706           | GTP hydrolysis and joining of the 60S ribosomal subunit                      | 34   | 122 | 3,18E-06 | 3,02E-04 | 3  | 3  | RPL4  |
| R-GGA-72766           | Translation                                                                  | 38   | 147 | 4,78E-06 | 3,53E-04 | 15 | 21 | RPL4  |
| R-GGA-927802          | Nonsense-Mediated Decay (NMD)                                                | 33   | 122 | 8,06E-06 | 4,84E-04 | 4  | 5  | RPL5  |

|               |                                                                              |    |     |          |          |    |    |        |
|---------------|------------------------------------------------------------------------------|----|-----|----------|----------|----|----|--------|
| R-GGA-975957  | Nonsense Mediated Decay (NMD) enhanced by the Exon Junction Complex (EJC)    | 33 | 122 | 8,06E-06 | 4,84E-04 | 3  | 4  | RPL5   |
| R-GGA-72613   | Eukaryotic Translation Initiation                                            | 34 | 130 | 1,17E-05 | 5,16E-04 | 12 | 17 | RPL4   |
| R-GGA-72737   | Cap-dependent Translation Initiation                                         | 34 | 130 | 1,17E-05 | 5,16E-04 | 12 | 17 | RPL4   |
| R-HSA-156902  | Peptide chain elongation                                                     | 36 | 99  | 1,11E-16 | 5,43E-14 | 5  | 5  | RPL5   |
| R-HSA-72689   | Formation of a pool of free 40S subunits                                     | 34 | 106 | 2,91E-14 | 7,10E-12 | 2  | 2  | RPL5   |
| R-HSA-72764   | Eukaryotic Translation Termination                                           | 34 | 108 | 4,82E-14 | 7,85E-12 | 3  | 5  | RPL5   |
| R-HSA-156827  | L13a-mediated translational silencing of Ceruloplasmin expression            | 35 | 118 | 8,22E-14 | 1,00E-11 | 2  | 3  | EIF4A2 |
| R-HSA-975956  | Nonsense Mediated Decay (NMD) independent of the Exon Junction Complex (EJC) | 34 | 102 | 1,28E-13 | 1,38E-11 | 1  | 1  | RPL5   |
| R-HSA-2408557 | Selenocysteine synthesis                                                     | 34 | 116 | 2,05E-13 | 1,99E-11 | 2  | 6  | RPL5   |
| R-HSA-1799339 | SRP-dependent cotranslational protein targeting to membrane                  | 34 | 120 | 4,09E-13 | 3,27E-11 | 5  | 5  | RPL5   |
| R-HSA-192823  | Viral mRNA Translation                                                       | 34 | 114 | 7,99E-13 | 5,19E-11 | 2  | 2  | RPL5   |
| R-HSA-72706   | GTP hydrolysis and joining of the 60S ribosomal subunit                      | 35 | 121 | 3,68E-11 | 2,10E-09 | 3  | 3  | EIF4A2 |
| R-HSA-927802  | Nonsense-Mediated Decay (NMD)                                                | 34 | 125 | 5,82E-09 | 2,97E-07 | 5  | 6  | RPL5   |
| R-HSA-975957  | Nonsense Mediated Decay (NMD) enhanced by the Exon Junction Complex (EJC)    | 34 | 125 | 5,82E-09 | 2,97E-07 | 4  | 5  | RPL5   |
| R-HSA-72737   | Cap-dependent Translation Initiation                                         | 35 | 131 | 6,78E-09 | 3,12E-07 | 13 | 18 | EIF4A2 |
| R-HSA-72613   | Eukaryotic Translation Initiation                                            | 35 | 131 | 7,74E-09 | 3,25E-07 | 15 | 21 | EIF4A2 |
| R-HSA-2408522 | Selenoamino acid metabolism                                                  | 34 | 188 | 7,56E-08 | 3,02E-06 | 2  | 32 | RPL5   |
| R-HSA-168273  | Influenza Viral RNA Transcription and Replication                            | 34 | 171 | 2,66E-06 | 1,04E-04 | 2  | 15 | RPL5   |
| R-HSA-168255  | Influenza Life Cycle                                                         | 35 | 183 | 1,28E-04 | 0,004357 | 3  | 52 | RPL5   |
